# Supplementary material for: A hollow CuS nanocube cathode for rechargeable Mg batteries: effect of the structure on the performance
Source: Royal Society of Chemistry journal article supplement (doi:10.1039/c9ta07470h), 2019-01-01
Supplement: c9ta07470h1.pdf [file c9ta07470h1.pdf]

## Electronic Supplementary Information

### Hollow CuS nanocube cathode for rechargeable Mg batteries: Effect of structure on the performance

Jingwei Shen,<sup>a</sup> Yujie Zhang,<sup>a</sup> Dong Chen,<sup>a</sup> Xue Li,<sup>a</sup> Zhongxue Chen,<sup>a</sup> Shun-an Cao,<sup>a</sup>

Ting Li<sup>\*b</sup> and Fei Xu<sup>\*a</sup>

<sup>a</sup> *Key Laboratory of Hydraulic Machinery Transients, Ministry of Education, School of Power and Mechanical Engineering, Wuhan University, Wuhan 430072, China*

<sup>b</sup> *Key Laboratory of Catalysis and Materials Science of the State Ethnic Affairs Commission, Ministry of Education, College of Chemistry and Materials Science, South-Central University for Nationalities, Wuhan 430074, China.*

\* E-mail:

Fei Xu (xufei2058@whu.edu.cn)

Ting Li (liting@mail.scuec.edu.cn)

**Supplementary data:** Additional figures and tables as mentioned in the text

## 1. Lab-made cell for the Mg battery test

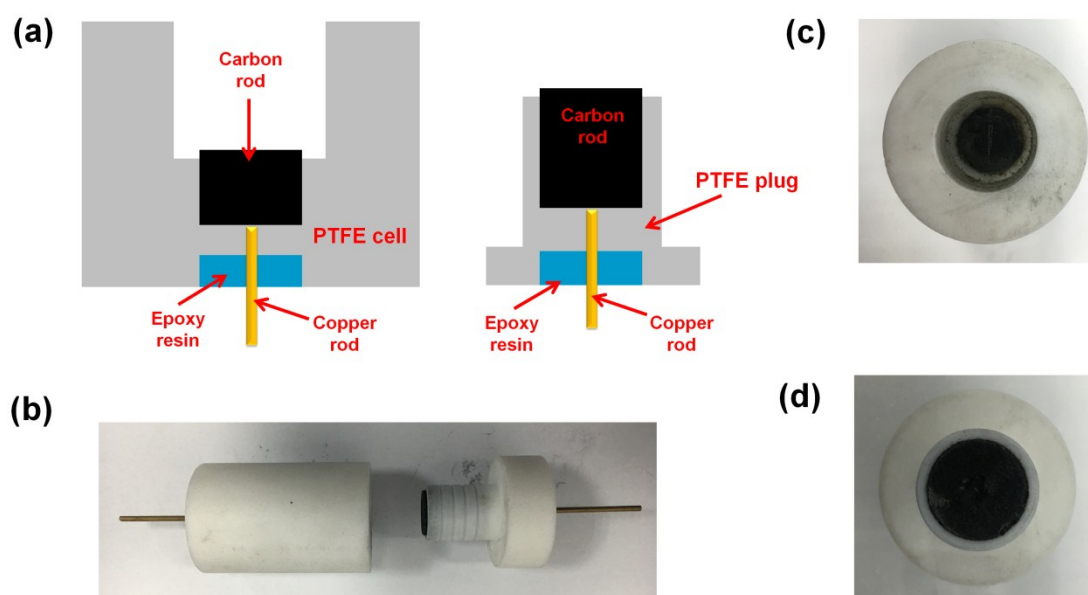

**Fig. S1** (a) Schematic drawing and (b, c, d) photos of the lab-made PTFE cell used for Mg battery tests. The cell is made of customer-designed PTFE cell body and carbon rod electrode (with a copper rod inserted in). Epoxy resin is used to fix the carbon electrode and seal the crack. PTFE tape is used for the sealing during the Mg cell fabrication.

## 2. Appearance comparison

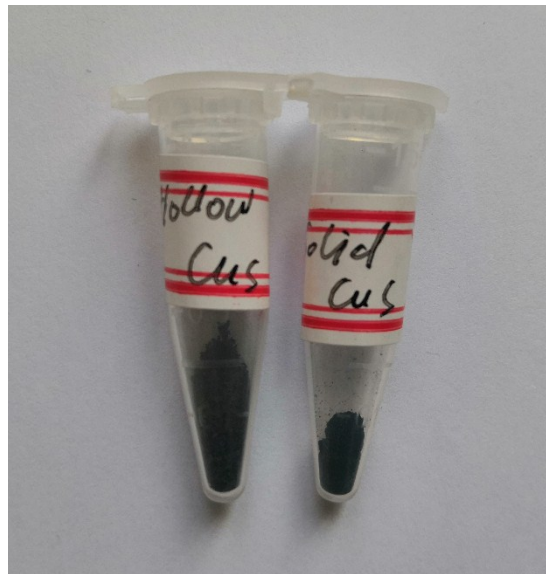

**Fig. S2** Hollow CuS nanocube (left) and commercial CuS (right) with the same mass.

### 3. EDX spectra of CuS-I

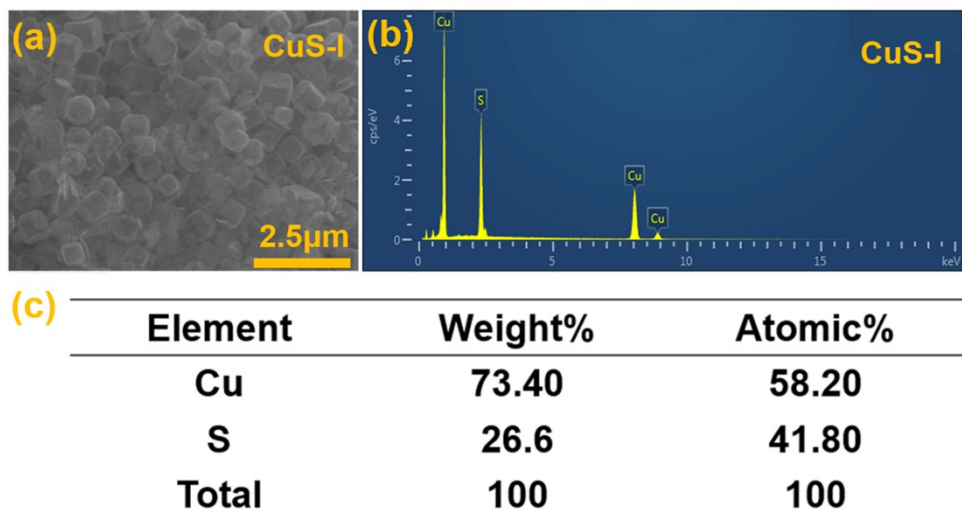

Fig. S3 SEM image and EDX spectra

#### 4. XPS spectra

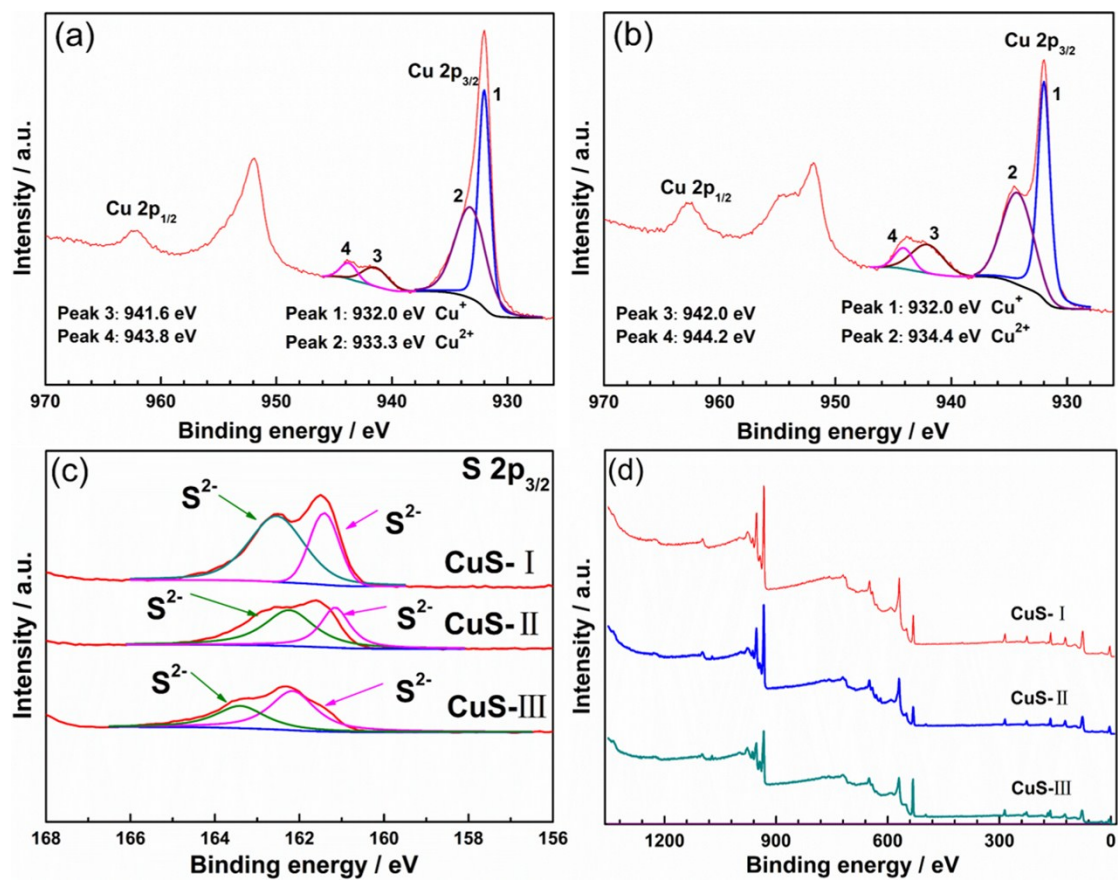

**Fig. S4** XPS spectra (Cu 2p) of (a) CuS-II and (b) CuS-III, (c) S 2p spectra, and (d) full spectra.

## 5. The charge/discharge curves and cycling performance of carbon cloth

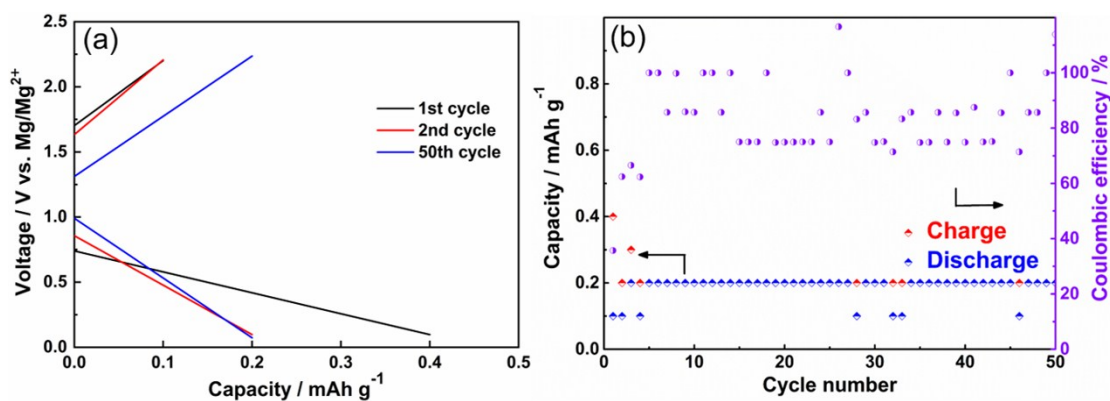

Fig. S5 The charge/discharge curves and cycling performance of carbon cloth.

## 6. Rate performance

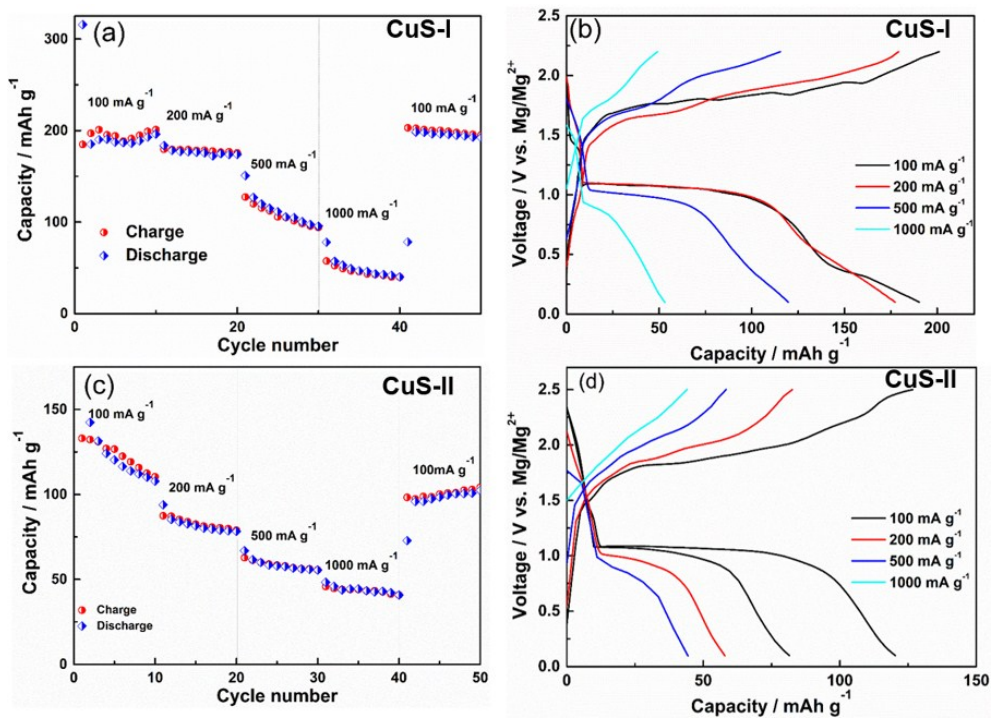

Fig. S6 Rate performance of CuS-I and CuS-II.

## 7. CV curves of CuS-II and CuS-III electrodes

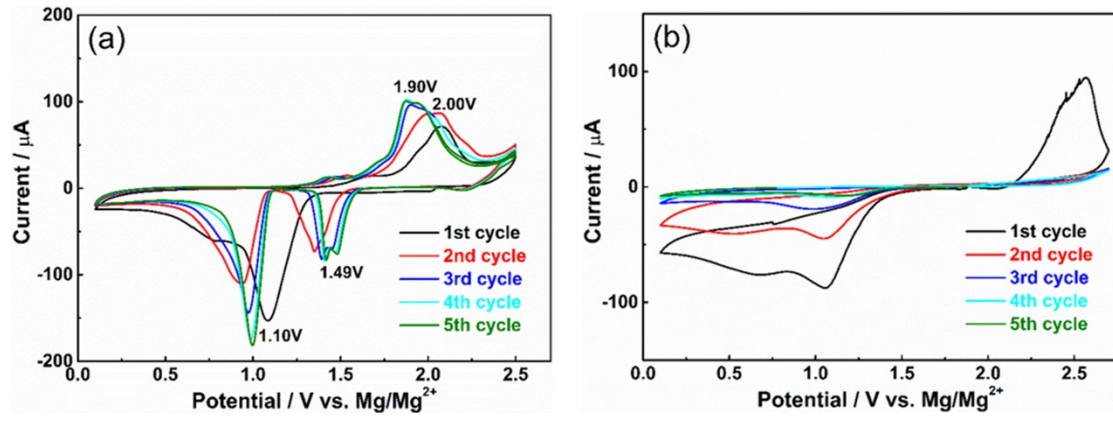

Fig. S7 CV curves of CuS-II and CuS-III electrodes



## 8. Determination of $Mg^{2+}$ diffusion coefficient for CuS-I and CuS-II

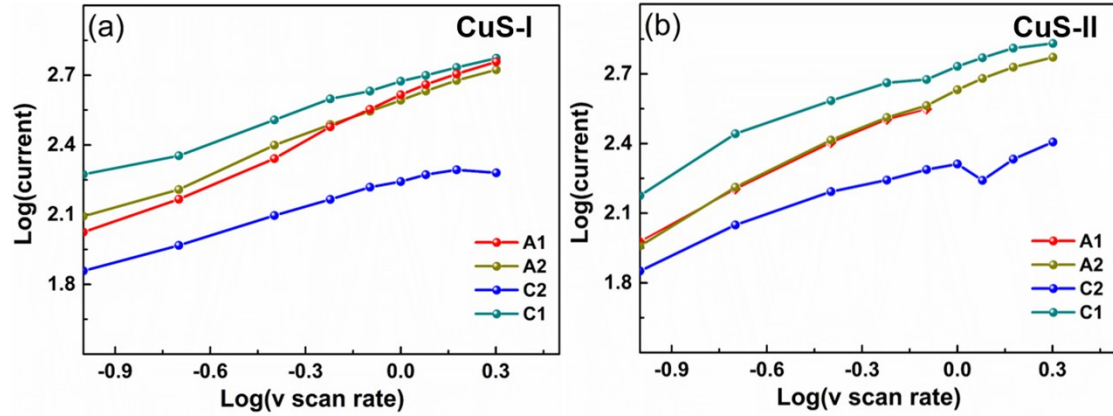

**Fig. S8** Log( $i$ ) vs. log( $v$ ) plots for different redox peaks of CuS-I and CuS-II electrodes.

**Table S1** Calculation of  $Mg^{2+}$  diffusion coefficients

| peak | CuS-I         |                                                  | CuS-II        |                                                  |
|------|---------------|--------------------------------------------------|---------------|--------------------------------------------------|
|      | $i_p/v^{1/2}$ | $D (\times 10^{-9} \text{ cm}^2 \text{ s}^{-1})$ | $i_p/v^{1/2}$ | $D (\times 10^{-9} \text{ cm}^2 \text{ s}^{-1})$ |
| C2   | -0.1193       | 8.158                                            | -0.1479       | 5.571                                            |
| C1   | -0.3825       | 83.86                                            | -0.4726       | 56.89                                            |
| A2   | 0.3816        | 83.47                                            | 0.4595        | 53.77                                            |
| A1   | 0.4475        | 114.8                                            | 0.3999        | 40.73                                            |

The diffusion coefficient of  $Mg^{2+}$  is calculated by the following equation:

$$i_p = 2.69 \times 10^5 n^{3/2} A D^{1/2} v^{1/2} C_0$$

where  $i_p$  is the peak current (A),  $n$  is the number of electrons per molecule during the reaction,  $A$  is the contact area between the electrode and electrolyte,  $D$  is the diffusion coefficient of  $Mg^{2+}$  ( $\text{cm}^2 \text{ s}^{-1}$ ),  $C_0$  is the concentration of  $Mg^{2+}$  ion in the electrode material, and  $v$  is the scan rate ( $\text{V s}^{-1}$ ).
